# Supplementary material
Source: Research Square preprint supplement (doi:10.21203/rs.3.rs-8056967/v1)
Supplement: Supplementary file 1 [file 22b8fcecb26e4d808dd686ae.docx]

**Appendix A – Teacher Support Scale (TSS)**

**Instructions**: Please indicate how much you agree with the following statements about your teachers.
**Scale**: 1 = Strongly Disagree | 2 = Disagree | 3 = Neutral | 4 = Agree | 5 = Strongly Agree

| **Item No.** | **Statement** | **1** | **2** | **3** | **4** | **5** |
| --- | --- | --- | --- | --- | --- | --- |
| 1 | My teachers encourage me to do my best. |  |  |  |  |  |
| 2 | My teachers notice when I am making an effort. |  |  |  |  |  |
| 3 | My teachers are willing to help me when I have difficulties with my studies. |  |  |  |  |  |
| 4 | My teachers provide constructive feedback on my work. |  |  |  |  |  |
| 5 | My teachers make me feel comfortable asking questions. |  |  |  |  |  |
| 6 | My teachers show interest in my learning progress. |  |  |  |  |  |
| 7 | My teachers treat me with fairness and respect. |  |  |  |  |  |
| 8 | My teachers support me when I feel stressed about my studies. |  |  |  |  |  |
| 9 | My teachers are approachable outside of class. |  |  |  |  |  |
| 10 | My teachers create a positive and inclusive classroom environment. |  |  |  |  |  |
| 11 | My teachers celebrate my achievements, even small ones. |  |  |  |  |  |
| 12 | My teachers motivate me to stay engaged in my studies. |  |  |  |  |  |

**Appendix B – Psychological Sense of School Membership (PSSM)**

**Instructions**: Please indicate how true each statement is for you.
**Scale**: 1 = Not at all true | 2 = Slightly true | 3 = Somewhat true | 4 = Mostly true | 5 = Completely true

| **Item No.** | **Statement** | **1** | **2** | **3** | **4** | **5** |
| --- | --- | --- | --- | --- | --- | --- |
| 1 | I feel like a real part of my college. |  |  |  |  |  |
| 2 | People at my college notice when I am good at something. |  |  |  |  |  |
| 3 | I feel proud to be a member of my college. |  |  |  |  |  |
| 4 | I feel comfortable being myself at this college. |  |  |  |  |  |
| 5 | Other students at this college respect me. |  |  |  |  |  |
| 6 | Faculty and staff at this college respect me. |  |  |  |  |  |
| 7 | I feel that I matter to my college community. |  |  |  |  |  |
| 8 | Sometimes I feel left out of things at my college. *(R)* |  |  |  |  |  |
| 9 | People at this college take my opinions seriously. |  |  |  |  |  |
| 10 | I feel connected to the community at my college. |  |  |  |  |  |
| 11 | There are people at this college I can trust. |  |  |  |  |  |
| 12 | I feel supported by my peers at college. |  |  |  |  |  |
| 13 | I feel supported by the faculty at college. |  |  |  |  |  |
| 14 | I can be successful at this college. |  |  |  |  |  |
| 15 | I am treated as an important member of this college. |  |  |  |  |  |
| 16 | I feel like I belong here more than in other places. |  |  |  |  |  |
| 17 | Sometimes I wish I were somewhere else. *(R)* |  |  |  |  |  |
| 18 | Overall, I feel like I am accepted and valued at this college. |  |  |  |  |  |

*(R) = Reverse-coded items*

**Appendix C – Student Engagement Instrument (SEI)**

**Instructions**: Please indicate how much you agree with the following statements.
**Scale**: 1 = Strongly Disagree | 2 = Disagree | 3 = Neutral | 4 = Agree | 5 = Strongly Agree

| **Item No.** | **Statement** | **1** | **2** | **3** | **4** | **5** |
| --- | --- | --- | --- | --- | --- | --- |
| 1 | I try to connect what I am learning in class to real life. |  |  |  |  |  |
| 2 | Learning is interesting to me. |  |  |  |  |  |
| 3 | I put forth effort even when the material is difficult. |  |  |  |  |  |
| 4 | I look for ways to challenge myself in my studies. |  |  |  |  |  |
| 5 | I set goals for what I want to learn. |  |  |  |  |  |
| 6 | I take time to reflect on what I have learned. |  |  |  |  |  |
| 7 | I feel connected to my college. |  |  |  |  |  |
| 8 | I enjoy participating in my classes. |  |  |  |  |  |
| 9 | I care about what my teachers think of me. |  |  |  |  |  |
| 10 | I feel proud when I do well in class. |  |  |  |  |  |
| 11 | I value the relationships I have with my peers. |  |  |  |  |  |
| 12 | Being part of this college matters to me. |  |  |  |  |  |
| 13 | I feel positive about my overall learning experience. |  |  |  |  |  |
| 14 | I put forth effort in my classes. |  |  |  |  |  |
| 15 | I come prepared for my classes. |  |  |  |  |  |
| 16 | I participate actively in class discussions. |  |  |  |  |  |
| 17 | I complete my assignments on time. |  |  |  |  |  |
| 18 | I pay attention during lectures. |  |  |  |  |  |
| 19 | I ask questions when I do not understand. |  |  |  |  |  |
| 20 | I look for additional resources to improve my learning. |  |  |  |  |  |

**Appendix D – Semi-Structured Interview Protocol**

**Instructions**: The following questions will guide the semi-structured interviews with a purposive sub-sample of 15 student teachers. Probing questions may be used where necessary to elicit deeper insights.

| **Question No.** | **Guiding Question** | **Purpose/Focus** |
| --- | --- | --- |
| 1 | Can you describe a time when a teacher made you feel especially supported or encouraged? | To explore perceptions of **teacher support** and its impact on students’ motivation. |
| 2 | How do your teachers help you overcome academic challenges or stress? | To understand the role of teachers in fostering **academic resilience**. |
| 3 | What makes you feel that you belong (or do not belong) in your college community? | To identify factors shaping students’ **sense of belonging**. |
| 4 | How do teacher support and your sense of belonging affect the way you engage in your learning? | To examine the **interplay between support, belonging, and engagement**. |
| 5 | In what ways has the post-pandemic learning environment influenced your connection with teachers and peers? | To assess the **impact of the post-pandemic context** on relationships. |
| 6 | What could your college do to better support your learning and engagement? | To gather **suggestions for institutional improvement**. |
| 7 | Is there anything else you would like to share about your experiences as a student teacher during this period? | To capture **additional insights** not covered in the above questions. |

**Format**: Interviews will last 30–45 minutes, conducted in Arabic or English (depending on participant preference), audio-recorded with consent, and later analyzed thematically.
