# Supplementary material
Source: Research Square preprint supplement (doi:10.21203/rs.3.rs-8056967/v1)
Supplement: Supplementary file 2 [file ba9463bed9d84c950cac8fa3.xlsx]

## Sheet: TSS_Responses
Participant_ID	Item_1	Item_2	Item_3	Item_4	Item_5	Item_6	Item_7	Item_8	Item_9	Item_10	Item_11	Item_12	Average_Score
1	4	5	3	5	5	2	3	3	3	5	4	3	3.75
2	5	2	4	2	4	5	1	4	2	5	4	1	3.25
3	1	3	3	2	4	4	3	4	4	1	3	5	3.08333
4	3	5	1	2	4	1	4	2	2	1	2	5	2.66667
5	2	4	4	4	4	5	3	1	4	2	4	2	3.25
6	2	4	5	2	2	4	2	2	4	4	1	5	3.08333
7	5	2	5	2	1	4	4	4	5	1	5	5	3.58333
8	1	1	1	1	4	3	3	1	3	3	1	3	2.08333
9	5	2	2	1	4	1	4	2	1	5	3	4	2.83333
10	3	3	1	3	5	3	1	5	2	3	1	2	2.66667
11	2	4	5	3	1	4	5	4	5	5	3	5	3.83333
12	4	5	3	3	4	2	2	5	1	5	4	4	3.5
13	4	4	4	3	2	4	1	1	1	1	3	1	2.41667
14	4	5	1	3	3	1	5	1	3	2	4	3	2.91667
15	1	4	1	1	2	4	4	2	3	1	5	1	2.41667
16	1	3	1	2	2	4	5	1	1	3	2	5	2.5
17	4	2	4	3	3	1	5	4	2	3	1	1	2.75
18	4	3	5	3	4	4	3	4	3	2	3	3	3.41667
19	4	4	1	1	2	1	3	4	1	1	2	2	2.16667
20	3	4	2	1	4	4	1	2	1	4	5	5	3
21	3	1	1	3	3	3	4	1	4	3	1	4	2.58333
22	4	3	1	3	1	5	2	2	2	3	5	1	2.66667
23	4	1	4	1	5	4	3	1	1	4	3	3	2.83333
24	5	3	3	3	2	5	1	4	1	5	4	5	3.41667
25	3	4	3	1	1	4	4	5	5	3	4	1	3.16667
26	5	5	1	5	3	4	1	4	5	5	1	3	3.5
27	2	1	2	2	3	2	2	3	2	2	2	1	2
28	1	1	3	5	2	2	3	2	1	5	4	2	2.58333
29	1	4	5	4	1	4	3	4	2	2	3	1	2.83333
30	2	5	2	2	1	4	2	3	4	5	1	5	3
31	4	4	4	5	4	5	4	3	4	5	2	4	4
32	2	3	1	3	4	2	2	5	2	5	1	4	2.83333
33	5	1	2	2	1	2	1	5	5	1	5	5	2.91667
34	5	3	4	2	3	5	1	5	4	5	1	4	3.5
35	5	4	2	2	5	4	1	5	2	2	5	4	3.41667
36	2	4	2	2	3	2	1	5	5	4	2	1	2.75
37	4	3	4	4	2	3	4	1	1	5	3	3	3.08333
38	5	4	3	1	1	2	3	4	5	5	4	2	3.25
39	5	3	2	3	1	2	5	2	2	2	2	3	2.66667
40	1	4	2	5	2	5	3	5	4	1	5	5	3.5
41	1	4	2	5	1	3	1	3	4	2	1	5	2.66667
42	4	1	5	1	3	1	1	1	4	1	5	3	2.5
43	3	1	4	4	5	1	3	4	1	4	4	3	3.08333
44	2	5	5	3	4	1	4	3	5	4	5	1	3.5
45	5	5	2	2	2	5	3	5	3	3	2	4	3.41667
46	1	2	2	4	1	5	5	2	1	2	3	2	2.5
47	2	5	5	5	3	5	1	4	1	1	5	4	3.41667
48	4	4	3	5	4	3	2	2	3	3	5	5	3.58333
49	2	4	2	4	4	5	1	1	3	5	4	1	3
50	4	1	1	1	5	2	4	5	5	5	5	5	3.58333
51	3	4	5	4	3	3	4	1	2	1	1	1	2.66667
52	5	3	1	3	4	2	4	4	5	2	4	4	3.41667
53	2	2	4	2	4	4	5	1	4	3	1	1	2.75
54	1	5	4	5	4	5	5	3	5	2	3	5	3.91667
55	1	2	2	2	3	5	5	1	1	2	1	3	2.33333
56	5	2	1	3	3	1	5	1	2	1	3	1	2.33333
57	5	4	1	5	5	3	5	5	5	5	2	2	3.91667
58	3	1	5	1	1	3	5	5	4	1	1	2	2.66667
59	4	2	2	2	3	3	2	4	1	4	5	3	2.91667
60	1	1	5	5	2	3	3	4	2	2	2	2	2.66667
61	3	3	2	4	1	1	4	2	3	1	5	5	2.83333
62	4	2	1	2	1	4	4	5	2	5	2	5	3.08333
63	3	3	3	3	1	3	4	4	1	3	3	3	2.83333
64	5	2	5	2	3	3	5	5	2	4	2	5	3.58333
65	5	1	5	1	4	2	2	1	2	5	3	1	2.66667
66	2	1	1	3	5	1	2	4	1	1	3	5	2.41667
67	4	2	4	2	5	2	3	3	3	3	4	5	3.33333
68	2	2	3	3	1	5	4	2	1	1	2	4	2.5
69	1	1	5	4	1	4	2	3	1	5	2	4	2.75
70	2	1	4	3	2	1	5	4	2	2	3	3	2.66667
71	5	5	1	1	5	5	4	3	1	3	3	5	3.41667
72	4	2	4	4	3	4	1	3	1	2	3	2	2.75
73	3	5	4	5	2	4	3	4	1	4	1	4	3.33333
74	1	2	5	3	4	5	3	3	1	2	2	5	3
75	2	4	2	5	2	4	1	5	1	1	1	3	2.58333
76	3	1	5	4	4	2	5	3	1	2	4	3	3.08333

## Sheet: PSSM_Responses
Participant_ID	Item_1	Item_2	Item_3	Item_4	Item_5	Item_6	Item_7	Item_8	Item_9	Item_10	Item_11	Item_12	Item_13	Item_14	Item_15	Item_16	Item_17	Item_18	Average_Score
1	3	1	4	5	3	1	5	4	3	5	5	5	3	3	2	4	1	5	3.44444
2	2	1	2	3	5	1	1	1	1	1	2	5	3	3	3	3	2	4	2.38889
3	5	1	4	3	4	5	1	1	5	5	3	1	4	2	2	5	3	2	3.11111
4	1	5	4	5	4	5	5	5	4	4	5	2	3	3	3	4	4	2	3.77778
5	3	3	5	4	3	2	2	3	4	2	5	2	1	1	4	3	4	4	3.05556
6	4	4	5	5	2	1	4	2	1	3	5	1	3	1	5	5	2	4	3.16667
7	1	1	3	5	1	5	1	2	4	1	5	2	1	3	4	1	2	3	2.5
8	2	2	3	2	3	1	3	3	4	3	3	1	4	5	1	1	5	3	2.72222
9	2	4	2	5	1	1	4	1	1	4	4	5	1	1	5	3	3	3	2.77778
10	5	1	5	5	3	2	1	3	2	2	4	1	2	3	4	1	5	3	2.88889
11	2	2	3	2	4	1	4	2	5	1	1	3	3	5	1	5	3	3	2.77778
12	1	4	2	3	3	4	4	5	5	2	2	1	5	3	5	3	4	5	3.38889
13	4	2	2	1	5	4	3	2	2	3	4	4	5	5	1	2	5	4	3.22222
14	3	4	2	4	1	2	3	1	2	3	1	1	2	5	1	1	3	4	2.38889
15	2	2	5	5	2	5	3	2	5	2	4	1	2	1	5	1	2	4	2.94444
16	5	2	5	3	1	3	2	4	5	1	5	2	5	1	2	5	4	2	3.16667
17	2	4	3	1	3	5	4	3	2	5	5	3	3	4	1	3	3	2	3.11111
18	5	1	2	4	4	3	3	4	3	1	3	5	3	2	1	2	2	5	2.94444
19	1	1	1	1	1	5	3	2	1	3	3	2	5	4	4	3	2	4	2.55556
20	3	5	4	3	3	1	5	1	2	1	1	4	3	5	1	5	1	2	2.77778
21	1	4	3	2	1	5	2	2	1	2	5	2	5	1	3	2	3	5	2.72222
22	2	4	3	2	3	2	1	3	4	4	5	2	3	5	3	2	4	1	2.94444
23	4	5	1	5	2	1	5	2	4	2	3	2	2	3	5	5	2	3	3.11111
24	3	4	5	1	5	5	4	1	4	1	2	1	4	5	1	1	3	5	3.05556
25	2	4	2	5	1	1	5	1	1	1	4	4	3	2	5	5	5	3	3
26	4	3	5	2	1	4	4	3	4	5	5	3	5	2	3	2	1	2	3.22222
27	1	1	2	3	5	5	1	1	3	4	2	1	5	3	2	3	2	2	2.55556
28	1	3	3	5	5	1	1	4	5	2	3	1	3	3	4	5	1	3	2.94444
29	1	2	4	2	1	1	5	3	3	2	4	3	5	2	2	5	4	5	3
30	4	5	5	1	2	5	5	3	2	3	2	3	5	5	1	3	4	1	3.27778
31	3	3	1	5	3	5	1	5	2	4	3	4	5	3	5	2	1	3	3.22222
32	2	2	3	5	2	4	2	5	5	4	2	5	3	1	1	1	2	4	2.94444
33	5	3	3	2	1	2	4	4	5	5	4	4	4	2	4	3	1	4	3.33333
34	1	2	1	2	3	2	2	5	4	4	3	3	4	5	4	5	3	1	3
35	3	3	2	2	2	2	5	4	1	3	5	1	5	5	3	4	2	4	3.11111
36	3	3	3	1	4	4	5	5	5	3	4	3	1	5	3	3	1	2	3.22222
37	4	2	5	3	1	1	4	2	4	3	4	1	1	5	5	3	2	4	3
38	3	5	4	5	4	2	3	4	1	1	4	4	4	1	1	4	5	5	3.33333
39	2	3	5	1	5	2	2	3	5	1	1	4	1	3	3	1	1	4	2.61111
40	1	4	4	1	2	2	4	1	2	1	1	1	5	1	5	4	2	2	2.38889
41	2	2	2	2	2	4	1	3	5	3	3	1	1	1	2	4	2	4	2.44444
42	4	3	3	4	4	2	2	3	1	4	2	3	2	4	4	5	1	5	3.11111
43	3	2	3	4	5	5	5	3	4	2	2	3	5	1	3	3	4	2	3.27778
44	3	3	5	5	1	4	1	5	2	5	4	5	4	4	4	4	4	2	3.61111
45	1	3	1	4	2	5	2	4	2	2	4	2	3	3	2	5	4	3	2.88889
46	5	2	5	1	3	2	4	2	4	2	5	5	5	1	4	5	1	4	3.33333
47	2	1	3	1	1	4	2	3	5	5	1	4	4	5	3	2	3	2	2.83333
48	5	2	4	1	1	5	4	3	4	1	1	4	4	1	3	5	5	4	3.16667
49	5	1	1	4	4	4	3	5	4	2	2	1	5	4	2	5	1	3	3.11111
50	5	5	3	5	1	1	3	4	2	4	5	2	3	3	2	1	2	5	3.11111
51	1	3	2	4	4	5	4	2	2	4	2	5	1	5	5	2	1	2	3
52	3	2	2	2	1	2	1	4	3	1	4	1	1	3	5	5	1	2	2.38889
53	4	2	2	1	1	1	1	5	1	5	5	1	3	4	2	5	4	3	2.77778
54	2	2	5	1	3	5	3	1	1	5	1	4	2	5	3	4	5	1	2.94444
55	1	1	1	3	4	2	3	3	2	2	1	3	5	2	2	4	5	5	2.72222
56	2	1	4	5	2	5	4	4	3	2	4	3	3	5	5	3	5	4	3.55556
57	1	4	3	3	4	5	5	3	2	5	4	5	4	3	5	4	3	2	3.61111
58	4	2	2	1	5	4	2	1	3	4	2	5	1	2	5	2	4	4	2.94444
59	4	1	4	5	2	3	5	5	4	1	2	1	2	2	1	5	2	1	2.77778
60	2	3	5	4	2	3	4	4	2	1	2	3	4	2	1	2	5	1	2.77778
61	3	4	2	1	5	1	5	3	4	3	2	1	5	5	1	1	2	3	2.83333
62	5	2	3	2	5	1	1	3	4	3	4	2	2	5	4	5	1	4	3.11111
63	3	1	1	3	1	4	5	1	4	2	4	5	4	3	5	2	3	4	3.05556
64	5	2	3	2	4	2	1	3	2	4	4	2	4	5	5	5	1	2	3.11111
65	1	4	1	4	4	3	5	4	3	5	4	4	1	1	5	4	2	1	3.11111
66	5	4	4	2	5	4	1	2	5	2	1	5	2	3	1	1	1	3	2.83333
67	3	4	2	4	2	3	3	4	5	4	2	4	1	2	2	5	3	2	3.05556
68	3	4	1	5	3	2	3	2	3	2	4	2	2	1	2	1	5	1	2.55556
69	4	1	5	4	3	3	1	1	5	5	2	5	2	4	1	4	5	4	3.27778
70	4	4	5	4	2	5	4	5	3	2	4	3	3	5	3	2	2	1	3.38889
71	2	3	2	5	1	3	1	3	5	1	4	3	4	1	4	4	1	5	2.88889
72	4	4	5	4	4	4	2	5	4	5	3	3	4	5	5	5	2	3	3.94444
73	5	5	2	2	5	1	5	5	2	2	5	5	5	2	5	5	4	1	3.66667
74	3	1	4	3	5	4	5	2	4	2	4	4	2	3	1	5	4	5	3.38889
75	2	5	2	5	1	1	1	1	1	1	2	4	5	1	2	2	2	4	2.33333
76	5	4	3	2	3	1	1	4	5	3	5	4	1	5	5	1	3	1	3.11111

## Sheet: SEI_Responses
Participant_ID	Item_1	Item_2	Item_3	Item_4	Item_5	Item_6	Item_7	Item_8	Item_9	Item_10	Item_11	Item_12	Item_13	Item_14	Item_15	Item_16	Item_17	Item_18	Item_19	Item_20	Average_Score
1	5	3	3	1	5	4	5	2	4	3	4	3	3	4	3	3	2	5	5	2	3.45
2	4	1	1	1	2	2	3	1	4	4	1	1	1	2	2	2	5	4	4	3	2.4
3	2	5	5	4	2	3	2	1	2	1	1	3	4	2	1	2	4	4	5	4	2.85
4	3	1	5	3	2	1	4	1	2	5	5	5	4	3	3	1	4	5	5	2	3.2
5	2	5	5	4	3	2	3	4	5	3	5	5	1	3	3	5	4	1	5	2	3.5
6	2	1	4	5	3	1	4	3	2	2	3	1	2	5	3	3	2	1	5	1	2.65
7	4	4	2	2	2	4	1	1	2	5	1	4	3	3	3	5	2	4	5	4	3.05
8	4	2	3	2	5	5	5	2	4	4	1	5	4	1	4	5	3	5	2	4	3.5
9	4	2	2	3	4	4	3	1	3	5	4	2	5	4	3	5	4	1	1	2	3.1
10	4	1	3	4	3	3	1	4	5	1	1	4	4	3	4	3	1	2	5	1	2.85
11	4	5	2	2	3	5	3	1	5	1	3	5	3	5	3	2	3	2	3	5	3.25
12	5	5	4	1	5	2	5	4	2	4	2	3	1	1	4	1	4	4	4	1	3.1
13	4	1	4	5	4	2	4	3	4	2	2	1	5	4	1	5	4	3	4	2	3.2
14	2	3	1	5	4	2	1	3	2	3	4	5	2	2	4	1	5	2	5	2	2.9
15	5	3	2	5	1	3	3	1	5	4	1	5	1	1	2	5	4	2	1	1	2.75
16	1	5	5	2	4	2	3	1	1	1	2	2	1	2	5	5	2	1	2	2	2.45
17	2	3	5	4	4	3	2	3	3	1	5	4	2	4	4	5	4	4	3	5	3.5
18	1	2	4	2	1	2	1	3	4	1	2	4	3	4	1	3	2	3	3	5	2.55
19	3	3	4	2	4	4	1	4	5	5	1	2	2	4	4	4	2	3	5	3	3.25
20	3	2	3	1	4	1	5	4	3	5	4	3	1	4	3	1	5	5	5	5	3.35
21	2	4	4	2	3	3	5	1	3	1	4	1	4	2	2	5	3	5	4	5	3.15
22	1	4	2	3	4	4	1	3	2	4	4	1	5	2	3	4	4	2	5	4	3.1
23	2	1	5	3	4	2	1	3	2	2	3	1	1	5	4	3	3	3	1	4	2.65
24	5	2	2	3	4	1	4	4	1	3	4	2	1	5	3	1	5	5	4	4	3.15
25	4	1	1	3	4	5	2	3	1	3	3	3	3	2	4	5	3	3	3	4	3
26	1	1	2	1	3	3	3	2	3	1	4	4	5	1	3	4	1	4	3	4	2.65
27	5	5	4	1	1	1	4	1	3	5	3	1	3	1	4	3	4	4	2	1	2.8
28	5	1	5	1	4	3	3	2	5	5	5	4	5	3	4	1	5	5	1	5	3.6
29	1	4	3	1	2	1	5	4	4	1	3	2	4	5	5	3	4	1	5	3	3.05
30	4	4	4	4	4	5	3	4	2	2	3	1	1	1	2	1	5	4	2	3	2.95
31	3	4	2	1	1	5	5	1	3	3	5	4	1	5	5	1	1	3	4	4	3.05
32	1	2	5	5	1	2	3	1	1	5	1	1	1	5	3	3	1	5	3	3	2.6
33	3	5	5	1	4	3	4	5	5	5	4	5	1	5	2	4	2	5	1	3	3.6
34	5	1	4	2	2	2	4	1	4	2	5	3	4	4	1	1	4	2	3	1	2.75
35	2	5	1	2	2	3	3	5	2	2	3	1	1	4	3	4	3	5	2	5	2.9
36	3	2	1	1	4	3	3	1	5	2	5	5	1	1	1	4	5	3	2	4	2.8
37	3	5	1	5	2	4	4	2	3	3	4	4	1	3	2	3	1	4	4	1	2.95
38	2	4	5	4	5	1	1	4	3	5	2	4	2	4	3	3	3	3	1	1	3
39	5	2	4	4	1	4	1	5	2	5	3	3	3	5	4	2	3	3	3	2	3.2
40	3	2	3	5	5	2	5	2	5	5	2	4	5	3	4	2	4	1	1	5	3.4
41	5	3	4	1	5	4	5	5	1	1	5	2	5	5	3	3	3	2	2	5	3.45
42	3	2	1	5	4	5	4	3	4	3	1	4	5	3	5	2	3	4	3	5	3.45
43	1	3	4	2	1	2	3	5	5	4	5	1	5	4	3	3	5	2	3	5	3.3
44	4	5	3	4	5	1	4	1	2	4	1	3	3	2	4	4	4	2	4	3	3.15
45	1	3	3	1	3	2	1	3	5	3	2	4	3	4	5	3	1	4	5	1	2.85
46	1	1	1	3	3	3	5	5	5	2	5	3	3	2	2	5	4	2	1	3	2.95
47	1	3	3	2	2	1	3	1	4	1	5	1	5	5	5	4	1	1	4	3	2.75
48	2	1	2	4	3	3	3	4	5	5	2	5	5	3	3	2	1	2	2	4	3.05
49	4	2	2	2	5	4	2	3	3	5	5	1	1	1	5	5	5	3	5	3	3.3
50	1	1	1	2	2	4	4	4	2	2	4	4	5	4	5	3	2	4	2	2	2.9
51	2	3	1	4	1	1	1	2	5	2	2	1	2	1	5	4	1	5	4	3	2.5
52	1	1	3	3	1	3	2	4	4	4	2	3	5	3	1	4	3	5	1	2	2.75
53	2	5	1	4	3	1	2	5	5	3	5	5	1	4	3	1	4	1	1	5	3.05
54	4	3	3	4	5	2	1	5	4	1	3	2	3	4	1	4	1	5	2	5	3.1
55	5	4	2	1	1	3	1	4	5	5	5	2	1	4	2	3	4	4	4	5	3.25
56	4	1	4	5	4	3	3	5	1	1	2	5	4	5	2	5	5	2	1	4	3.3
57	2	3	1	3	1	4	4	5	3	1	4	2	4	2	1	4	4	1	4	2	2.75
58	4	3	5	2	3	1	2	5	5	1	1	2	4	1	4	3	5	4	5	4	3.2
59	3	1	3	1	1	5	3	4	3	5	1	5	2	2	4	5	4	4	2	4	3.1
60	2	1	5	4	2	3	4	1	1	3	2	4	2	1	2	1	2	3	5	3	2.55
61	3	5	5	4	4	3	3	1	1	4	4	1	1	2	2	1	2	5	4	4	2.95
62	1	3	1	2	3	2	5	2	5	5	2	2	5	3	5	4	5	3	4	1	3.15
63	1	3	5	2	3	4	4	1	4	3	4	3	2	1	4	3	5	1	2	3	2.9
64	2	2	4	4	3	5	3	5	2	1	3	3	5	2	2	5	2	4	1	3	3.05
65	1	3	4	2	5	4	1	5	2	4	5	4	4	2	3	5	2	4	2	3	3.25
66	5	3	1	5	3	4	5	5	2	4	1	3	2	3	1	1	5	1	3	4	3.05
67	4	5	3	3	1	3	2	1	2	5	4	5	4	5	3	2	4	1	2	1	3
68	2	2	5	4	4	2	3	3	1	1	5	2	1	1	2	5	1	5	4	5	2.9
69	3	3	5	3	4	2	3	3	5	4	2	5	5	4	2	4	2	4	5	5	3.65
70	1	3	4	1	3	4	2	3	5	1	3	3	5	4	2	5	2	4	3	2	3
71	1	1	5	4	5	5	5	1	1	5	1	4	5	1	2	5	5	4	3	3	3.3
72	4	4	4	3	4	1	5	5	2	2	5	1	3	3	1	3	4	5	5	1	3.25
73	3	2	2	3	2	1	1	3	2	1	1	4	4	1	3	5	5	1	1	1	2.3
74	3	4	1	1	2	3	1	2	5	1	1	2	3	1	5	1	5	4	4	5	2.7
75	3	1	1	4	5	1	1	3	2	4	4	2	1	3	3	4	3	2	1	2	2.5
76	5	4	3	5	3	1	1	1	3	5	1	5	3	5	3	3	4	3	3	2	3.15
